# Supplementary material
Source: PubMed Central journal article supplement (PMC3918412)
Supplement: NIHMS551218-supplement-01.pdf [file NIHMS551218-supplement-01.pdf]

## **“TRPV3 channels mediate strontium-induced mouse egg activation”**

Ingrid Carvacho, Hoi Chang Lee, Rafael A. Fissore, and David E. Clapham

### **Supplemental Information**

#### **Supplemental Experimental Procedures**

##### *Immunofluorescence staining*

The *zona pellucida* (ZP) was removed, washed several times in 2% goat serum-supplemented Dulbecco's PBS (PBS–BSA) and then fixed in PBS–BSA containing 2% paraformaldehyde for 45min at room temperature. Eggs were washed and blocked in PBS containing 0.1M glycine, 2% goat serum and 0.01% Tween 20 for at least 1 h. Eggs were then permeabilized with 0.1% Triton X-100 for 15 min at room temperature. Samples were then transferred into PBS–PVA supplemented with 2% goat serum followed by incubation overnight at 4°C with anti-TRPV3 antibody (10 µg/ml, Neuromab). Eggs were washed with PBS–BSA, and incubated with Alexa Fluor 546-conjugated goat anti-mouse IgG (1:500, Life Technologies) for 1 h at room temperature. Eggs were washed and incubated with Hoechst 33342 (Life Technologies) for 15 min at room temperature. WT and *V3-KO* eggs were processed in parallel and mounted on slide glasses, taken at room temperature, and the images acquired the next day with a FluoView-1000 laser scanning confocal microscope (Olympus). The objective used was 60x (UPLSAPO) water immersion NA: 1.20. Images were processing in Image J software.

### *Sperm isolation and IVF*

Sperm cells were obtained from 10-16 week-old male C57BALB6 mice (Jackson labs.). The cauda epididymis of the sacrificed mice was collected and sliced with scissors in 500  $\mu$ l of M2 medium. The slices were incubated for 10 min at 37° C. The sperm were later transferred to HTF medium equilibrated for 30 min-1 h in 5% CO<sub>2</sub> at 37° C. The released sperm cells were diluted to 2.2-2.5 x 10<sup>6</sup> cells/ml in 500  $\mu$ l and this stock suspension was incubated either 2 h for standard IVF or 3.5 h for insemination on the microscope stage (**Fig. 5**). Expanded cumulus-oocyte complexes were released from the oviduct and directly transferred to a drop of 100  $\mu$ l HTF medium and 0.1-0.3 x 10<sup>6</sup> sperms/ml added. Complexes were incubated for 2 h, washed of excess sperm and cultured for an additional 23 h. Eggs were cultured to the 2-cell stage. For insemination on the microscope, populations of 10-25 *zona pellucida*-free eggs loaded with Fura-2 AM were placed in an imaging dish in 90  $\mu$ l of HCZB covered by mineral oil. The dish was connected to a temperature controller (BIOPTECH Delta T4 culture dish controller) set at 37° C. 10  $\mu$ l of sperm from a solution of 2.2 x 10<sup>6</sup> sperms/ml. Eggs start to generate their first Ca<sup>2+</sup> transients in about 1-10 min (Swann, 2013).

## Supplemental Results

### Supplemental Figure Legends

**Figure S1, Related to Figure 1.** *TrpV3* deletion does not alter mouse fertility under in-house breeding conditions. **A.** The number of pups from *TrpV3*<sup>-/-</sup> females does not differ substantially from the number of pups/litter from *TrpV3*<sup>+/-</sup> females. **B.** The number of eggs obtained per superovulation cycle varies widely, but was not significantly different between *TrpV3*<sup>-/-</sup>, *TrpV3*<sup>+/-</sup> and *TrpV3*<sup>+/+</sup> animals in this sample size.

**Figure S2, Related to Figure 6.** Carvacrol terminates calcium oscillations by enabling calcium influx through TRPV3 channels. **A.** Calcium oscillations were induced by injection of 0.01 µg/µl mPLCζ cRNA. *Left panel:* [Ca<sup>2+</sup>]<sub>i</sub> oscillations in control eggs (*TrpV3*<sup>+/+</sup>, n=9). *Right panel:* *TrpV3*<sup>-/-</sup> eggs (*TrpV3*<sup>-/-</sup>, n=11). 50 µM carvacrol applied to V3-KO eggs yielded the same results as those induced by 100 µM.
