# Supplementary material
Source: PubMed Central journal article supplement (PMC3918412)

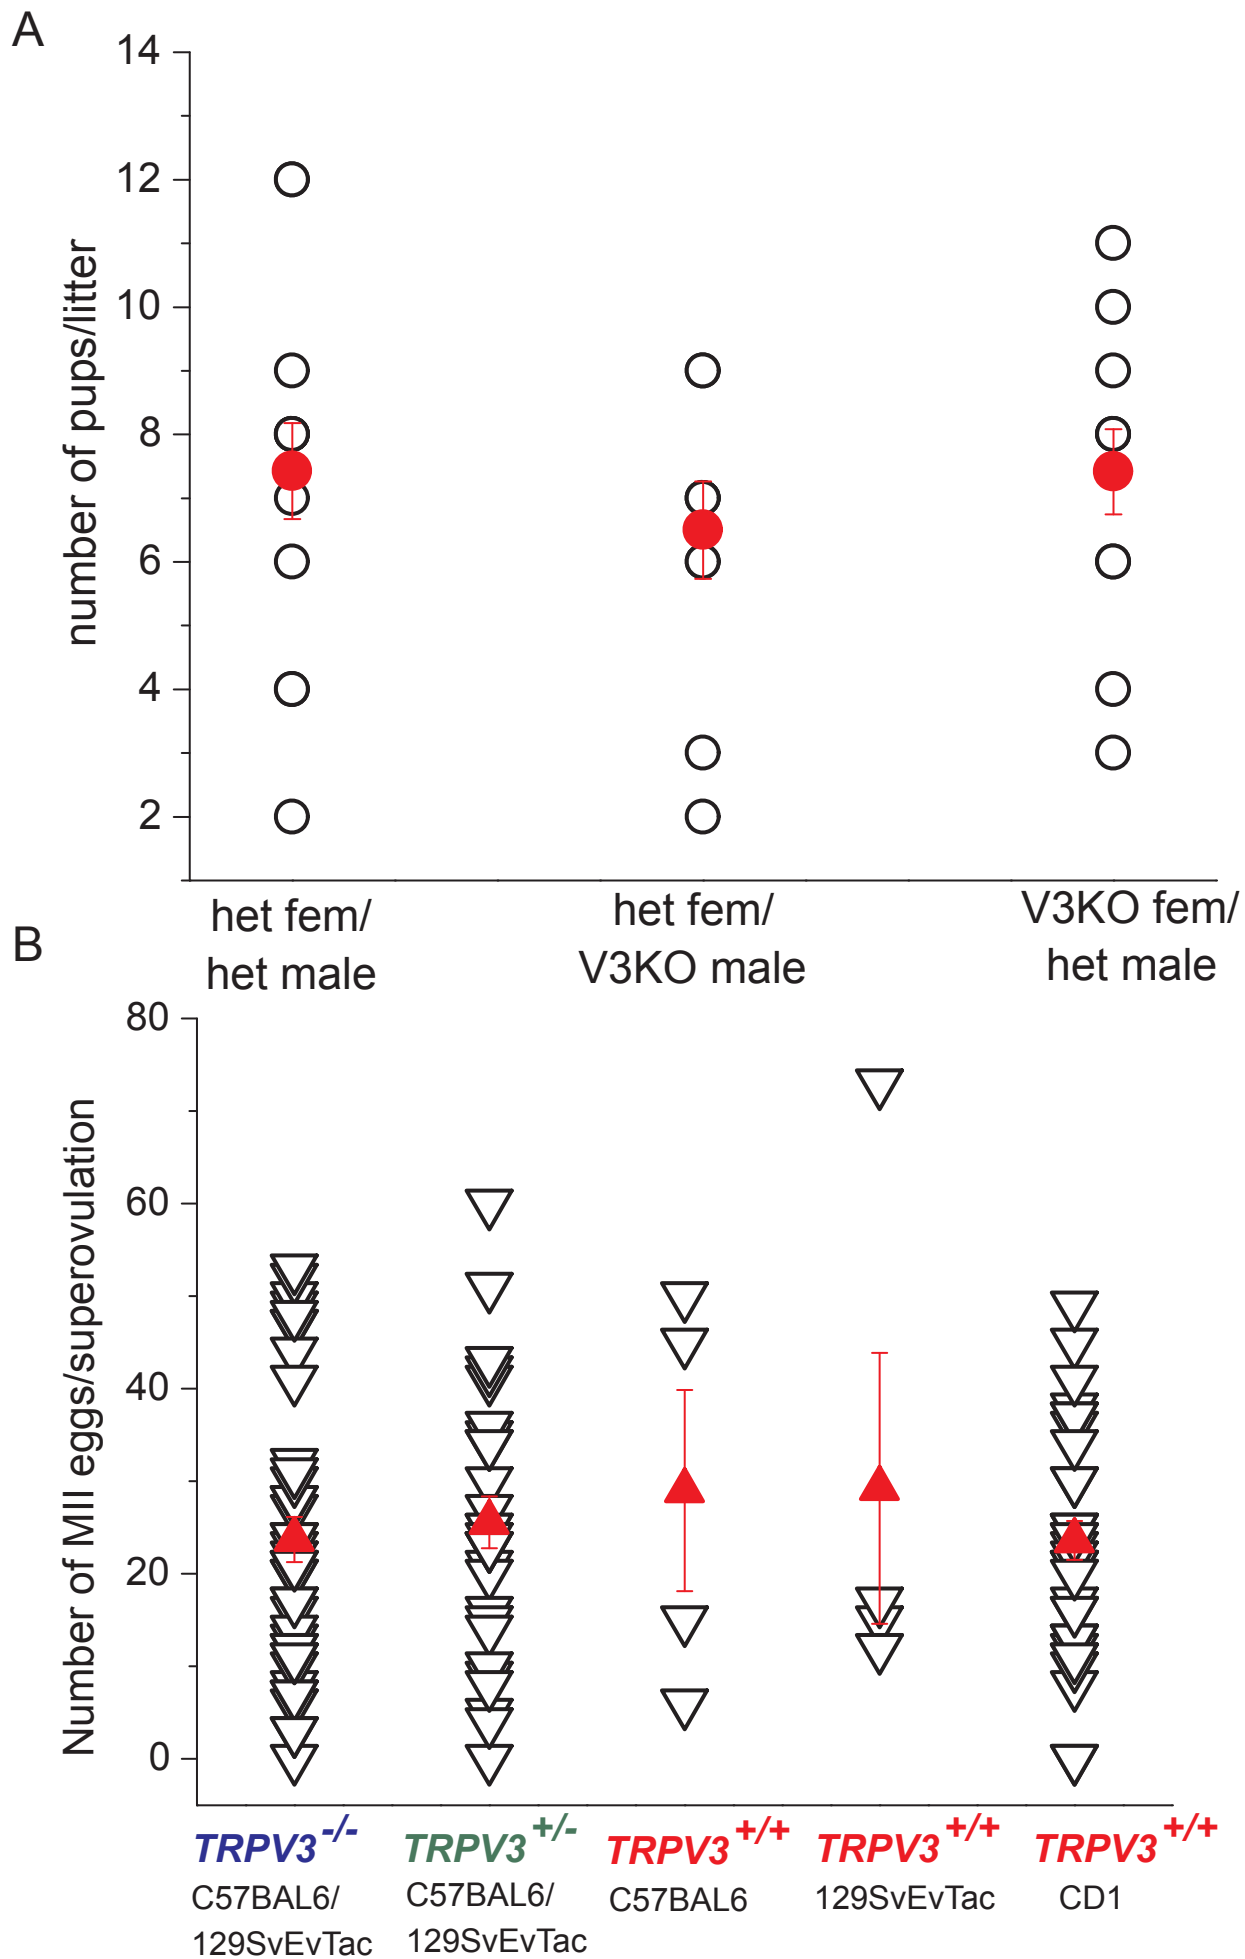

Figure S2

A

*TRPV3*<sup>+/+</sup>  
Carvacrol 100μM

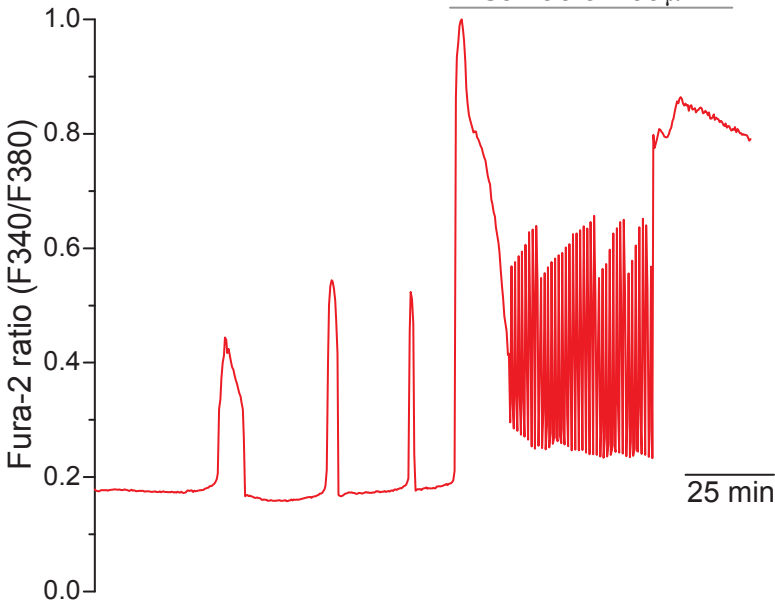

*TRPV3*<sup>-/-</sup>  
Carvacrol 100μM

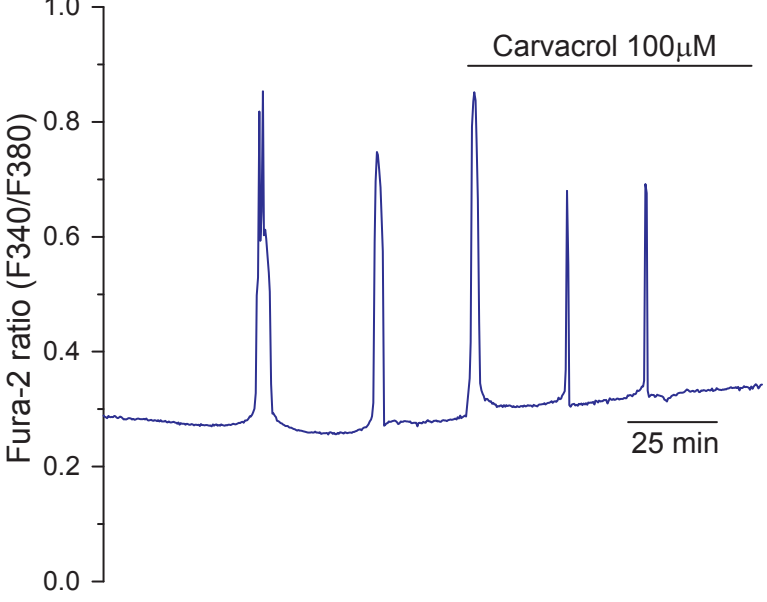

Supplement: NIHMS551218-supplement-02.pdf [file NIHMS551218-supplement-02.pdf]
